# Supplementary material for: Lactate dehydrogenase, an independent risk factor of severe COVID-19 patients: a retrospective and observational study
Source: publisher site journal article supplement (doi:10.18632/aging.103372), 2020-06-24
Supplement: Supplementary file [file aging-v12i12-103372-supplementary-material-SD2.pdf]

## SUPPLEMENTARY TABLE

Supplementary Table 1. Semiquantitative rating system based on CT image.

| Methods                    | Based on Lobes              |                  | Based on Whole Lung                                         |
|----------------------------|-----------------------------|------------------|-------------------------------------------------------------|
|                            | 6-part                      | 5-part           |                                                             |
| <b>Evaluation Range</b>    | 0, 1, 2, 3, 4               | 0, 1, 2, 3, 4, 5 | Disease dimension/whole lung dimension (%)                  |
| <b>Evaluation Standard</b> | Based on the lobes involved |                  | Based on whole lung                                         |
|                            | 0, % lesion                 | 0, 0% lesion     | Calculate the mean, maximum and minimum CT value of lesions |
|                            | 1, <25%                     | 1, <5%           |                                                             |
|                            | 2, 26-49%                   | 2, <25%          |                                                             |
|                            | 3, 50-75%                   | 3, 26-49%        |                                                             |
|                            | 4, >75%                     | 4, 50-75%        |                                                             |
| <b>Advantage</b>           | Easy                        | Standard         | More quantitative                                           |
